# Supplementary material for: Noteworthy occurrences among six marine species documented with community engagement in the Canadian Arctic
Source: publisher site journal article supplement (doi:10.1515/ami-2020-0113), 2021-01-01
Supplement: Supplementary file 1 [file ami-2020-0113_sm.pdf]

## Appendix – corresponding photos of noteworthy occurrences

Noteworthy occurrences among six marine species documented with community engagement in the Canadian Arctic

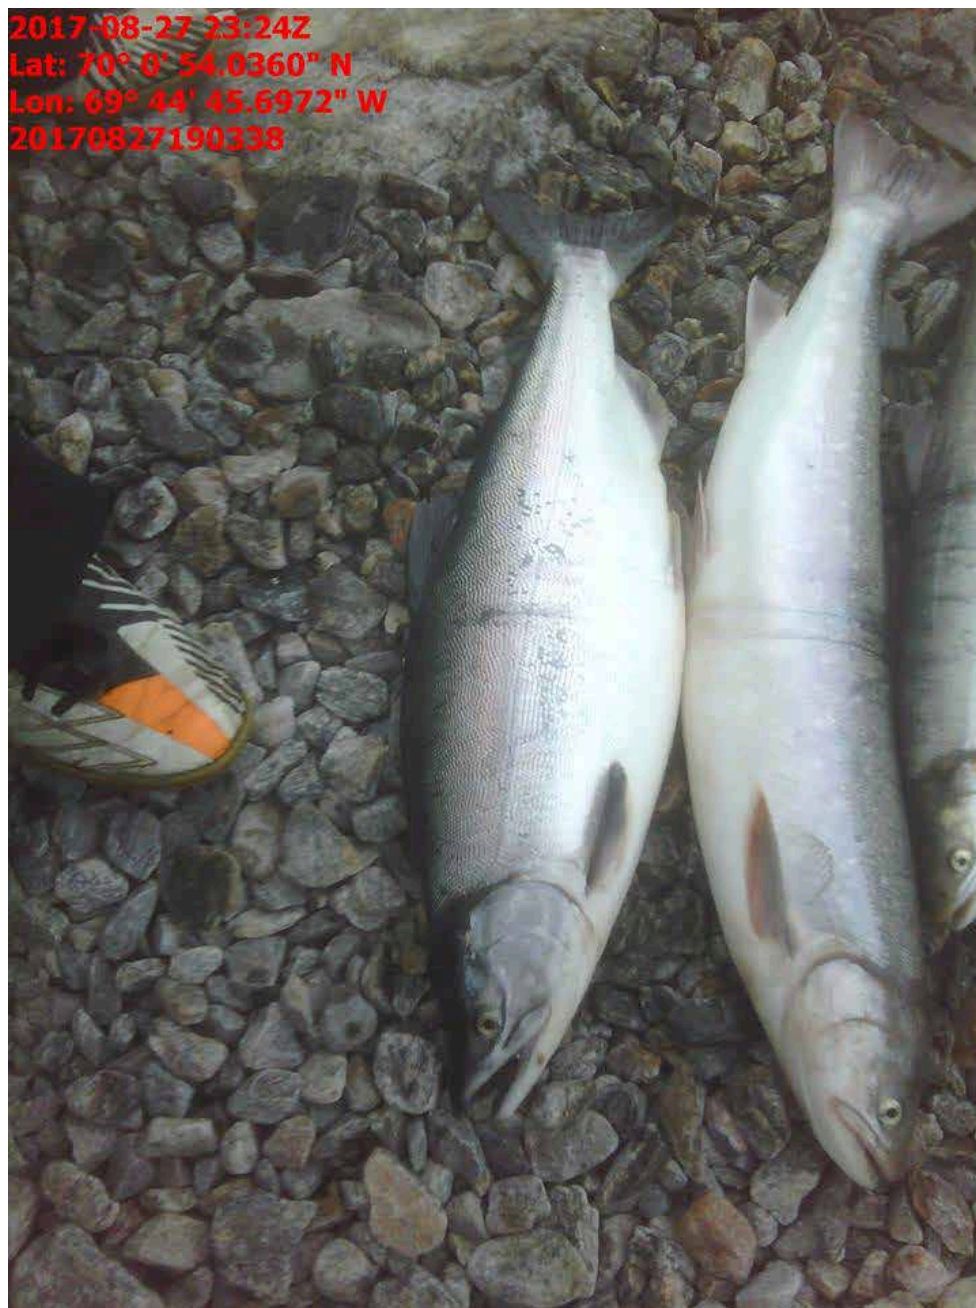

**Figure A1.** Pink Salmon (left), *Oncorhynchus gorbuscha*, captured near Clyde River, NU, on August 27th, 2017. Photo: Bennie Hainnu.

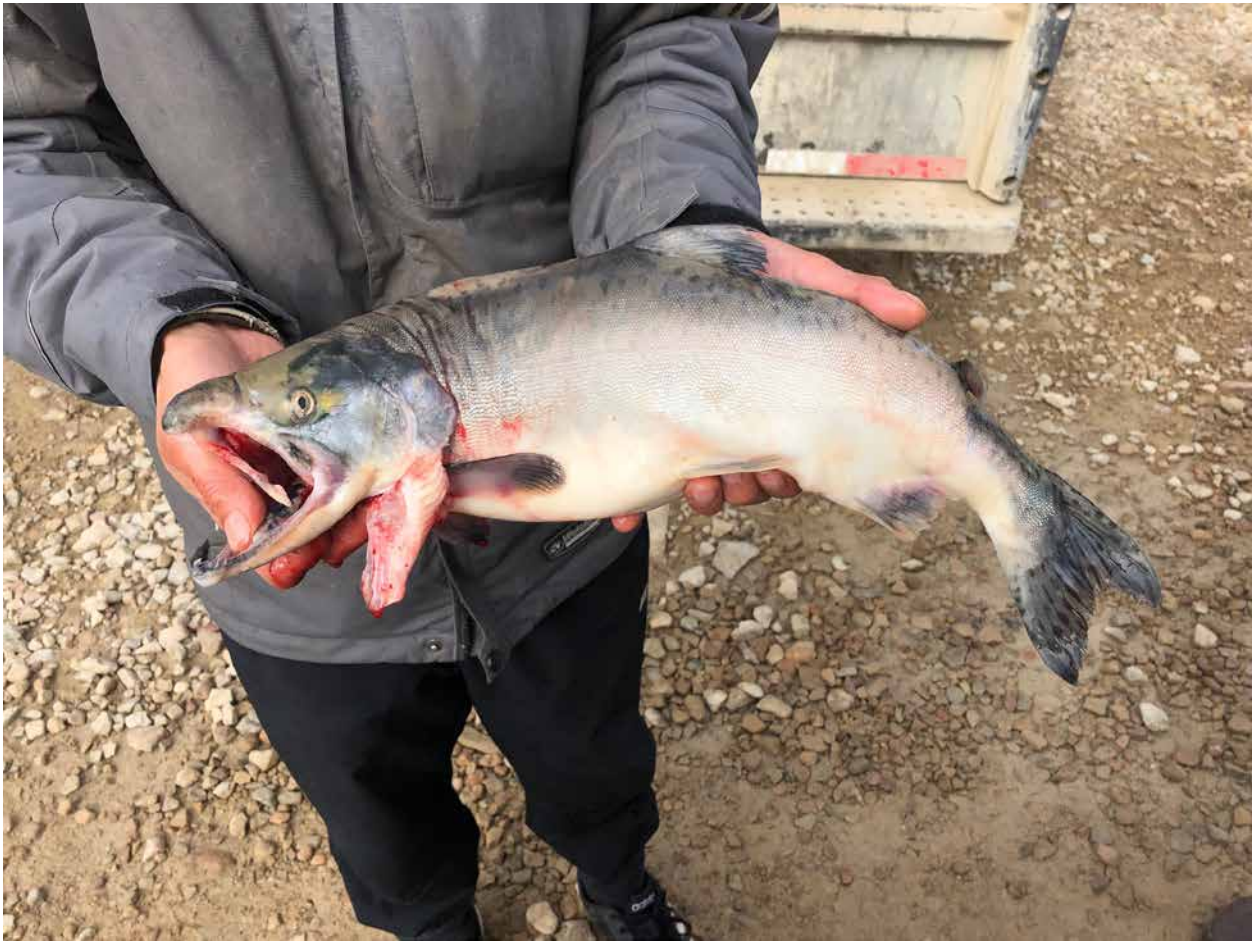

**Figure A2.** Pink Salmon, *Oncorhynchus gorbuscha*, captured near Cambridge Bay, NU (Ferguson Lake) on August 24, 2019. Photo: Nathan Kaosoni.



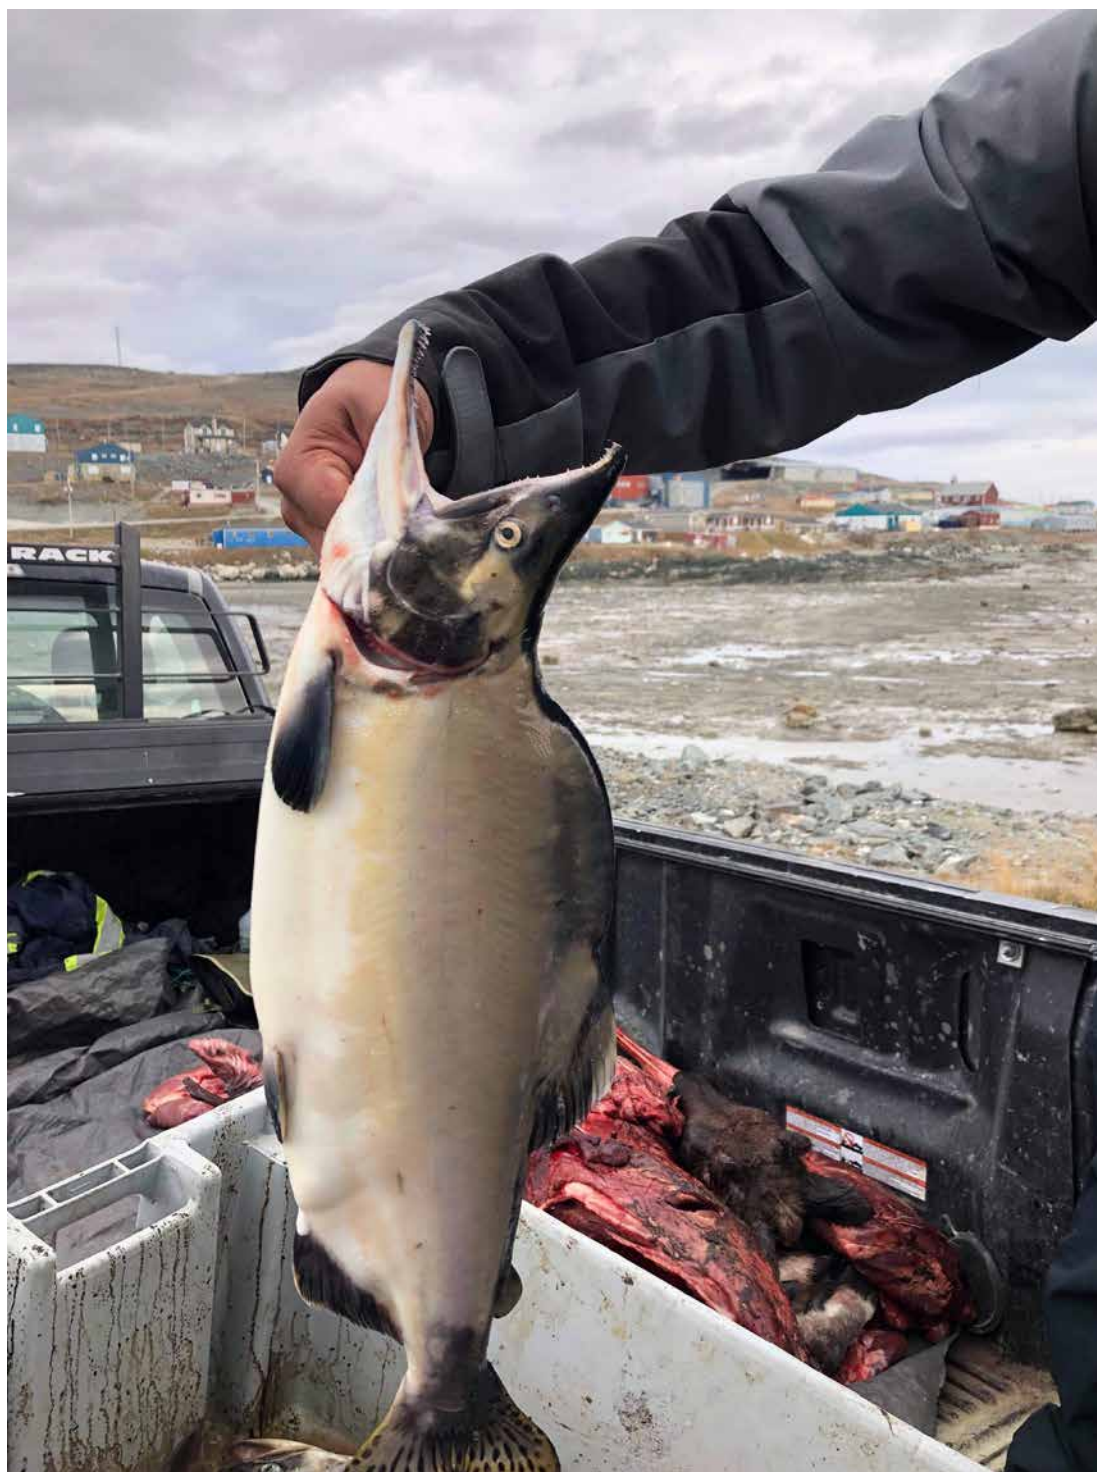

**Figure A3.** Pink Salmon, *Oncorhynchus gorbuscha*, captured near Kangirsuk, QC, on the Arnaud River (Ungava Bay), on September 17, 2019. Photo: Zebedee Annahatak.

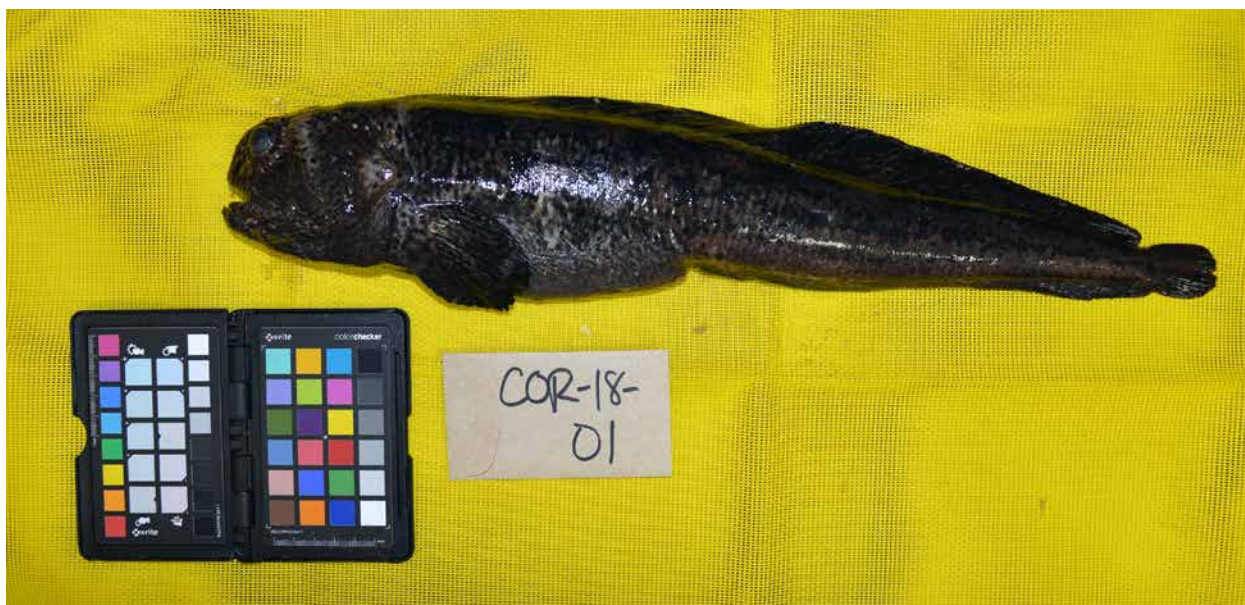

Figure A4. Bering Wolffish, *Anarhichas orientalis*, captured in Kugluktuk Nunavut, August 18th, 2018. Photo: Tracey Loewen.

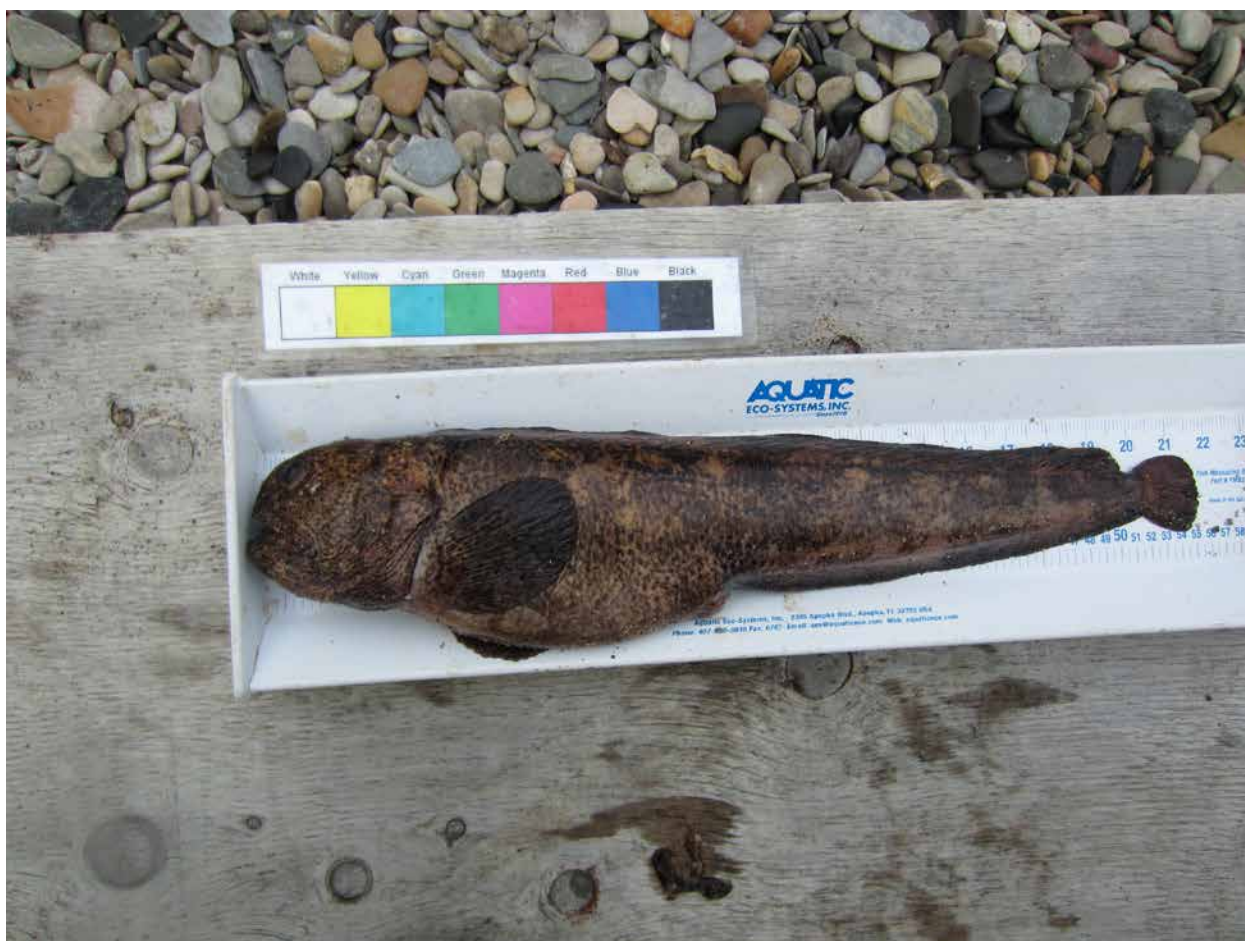

Figure A5. Bering Wolffish, *Anarhichas orientalis*, captured in Argo Bay (Darnley Bay, NT) near the community of Paulatuk on July 22nd, 2019. Photo: Brandon Green.



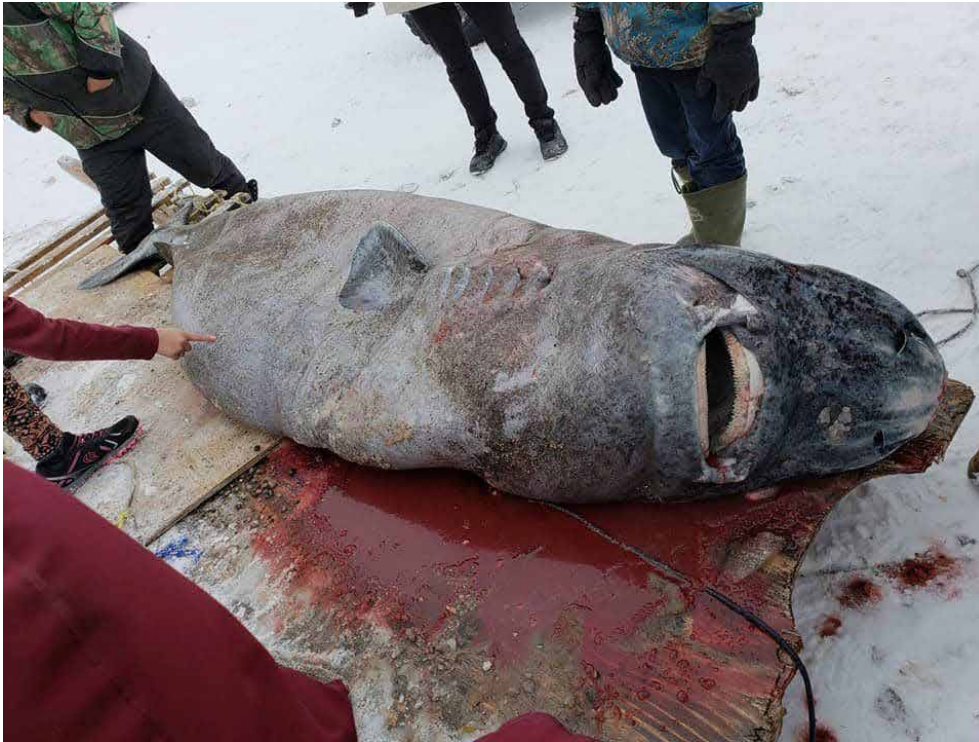

**Figure A6.** Greenland Shark, *Somniosus microcephalus*, captured in Coral Harbour, NU, on October 1, 2018. Photo: <https://nunavutnews.com/nunavut-news/greenland-shark-creates-a-buzzin-coral-harbour/>.

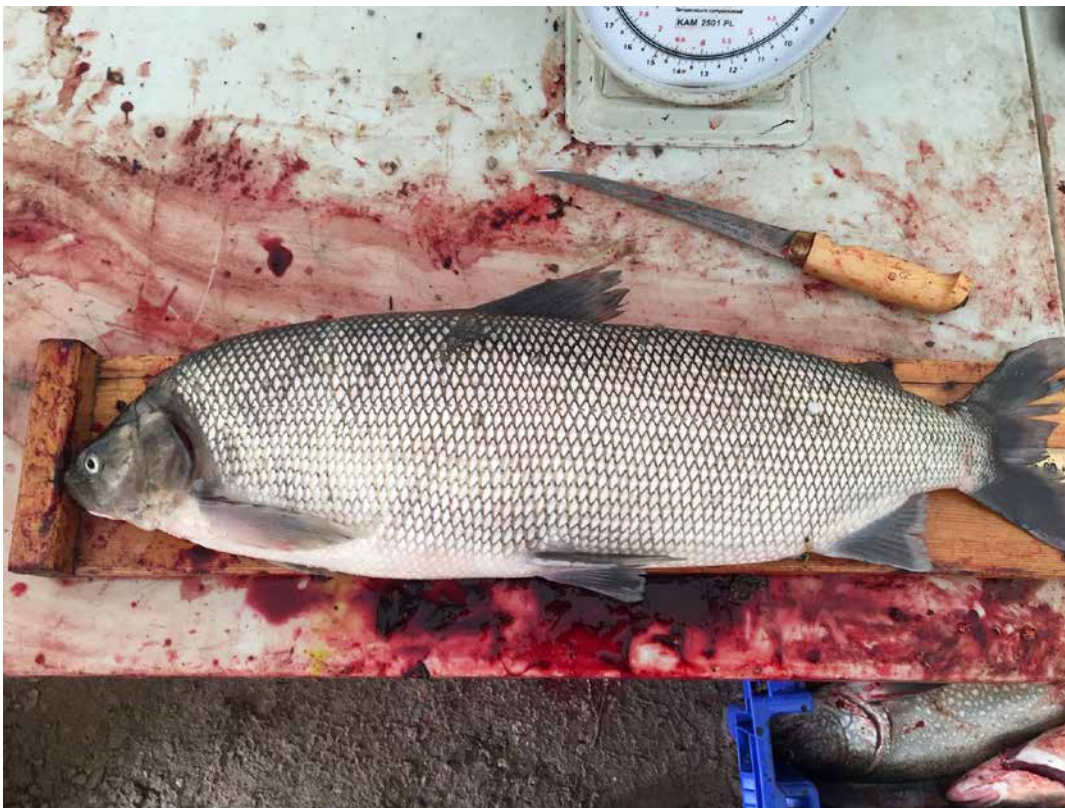

**Figure A7.** Broad Whitefish, *Coregonus nasus*, captured near Cambridge Bay (Lauchlan Lake) on July 12th, 2018. Photo: Brendan Malley.

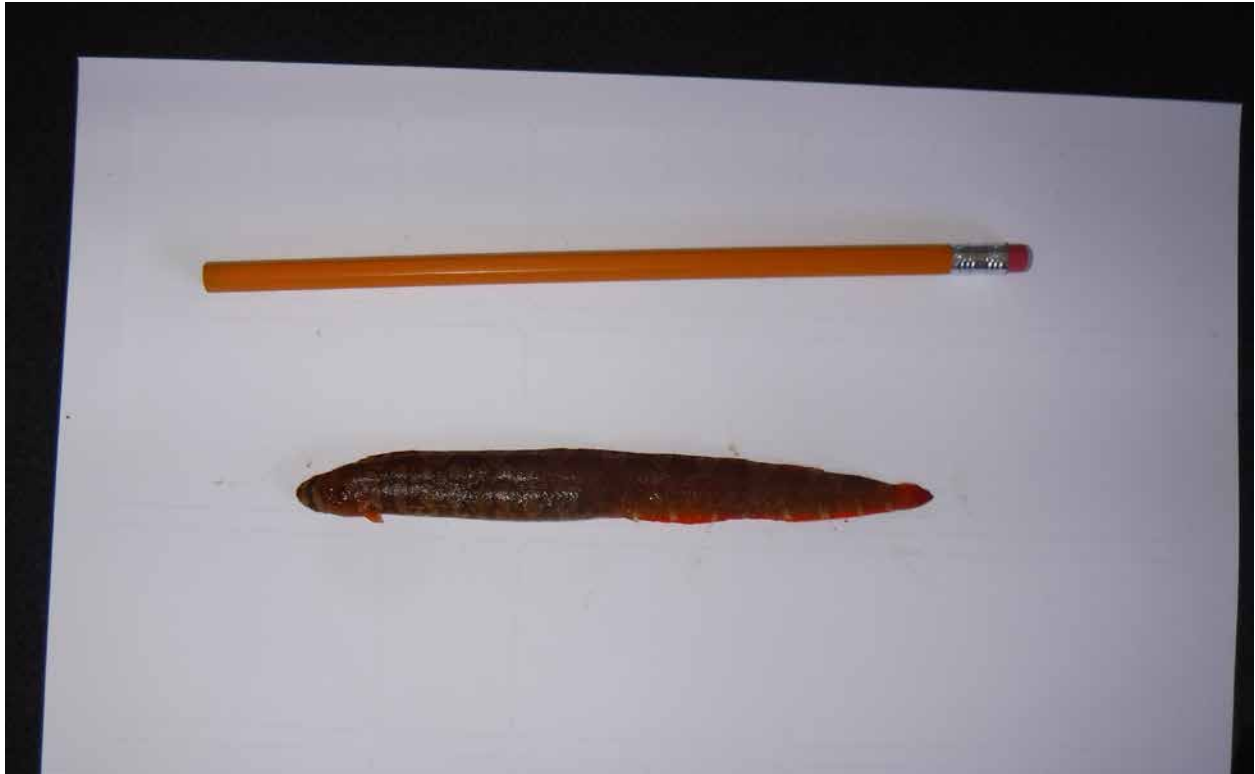

**Figure A8.** Banded Gunnel, *Pholis fasciata*, captured at Bennett Point (Darnley Bay, NT) near the community of Paulatuk on July 27th, 2019. Photo: Steve Illasiak.

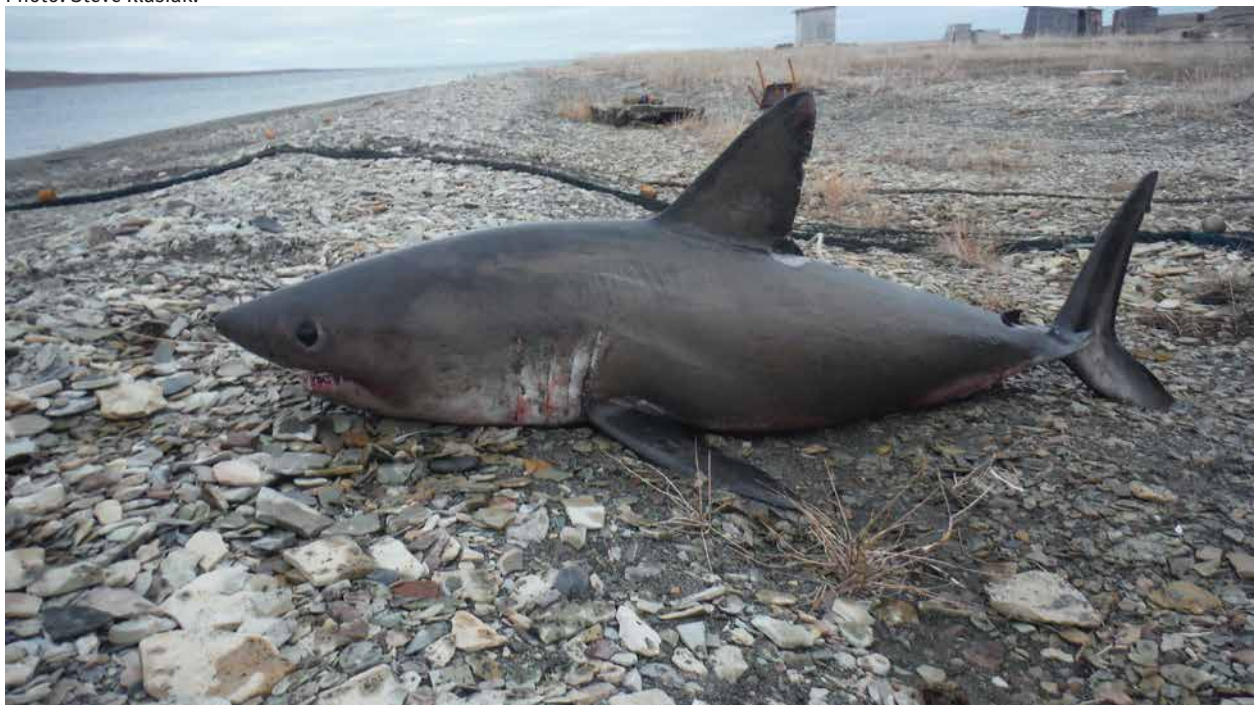

**Figure A9.** Salmon Shark, *Lamna ditropis*, captured in Kugluktuk, NU, on September 18th, 2019. Photo: John Kapakatoak.
